# Supplementary material for: Evidence mapping and overview of systematic reviews of the effects of acupuncture therapies
Source: HighWire-hosted journal article supplement (doi:10.1136/bmjopen-2021-056803), 2022-06-01
Supplement: bmjopen-2021-056803supp001_data_supplement.pdf [file bmjopen-2021-056803supp001_data_supplement.pdf]

| Study                               | Therapeutic area (disease/condition)                                          | NO.of RCTs | Tsample | Csample | SMD(95% CI)        | CoE      |
|-------------------------------------|-------------------------------------------------------------------------------|------------|---------|---------|--------------------|----------|
| <b>Moderate Effect</b>              |                                                                               |            |         |         |                    |          |
| <b>Lu Jing 2018</b>                 | <b>Periprocedural care (Breast cancer)</b>                                    |            |         |         |                    |          |
| MA/EA vs WM                         | Severity of hot flashes after breast cancer surgery*                          | 2          | 115     | 135     | -0.61(-0.87,-0.36) | Low      |
| MA vs NI                            | Severity of hot flashes after breast cancer surgery (follow-up for 3 months)* | 1          | 85      | 105     | -0.44(-0.73,-0.15) | Low      |
| <b>Wei-Wei Tao 2016</b>             | <b>Oncology (Symptom management of cancer)</b>                                |            |         |         |                    |          |
| MA vs SC                            | Severity of nausea and vomit *                                                | 2          | 166     | 162     | -0.48(-0.7,-0.26)  | Low      |
| <b>Wenjuan Fan 2020</b>             | <b>Neurology (Post-stroke spastic hemiplegia)</b>                             |            |         |         |                    |          |
| MA vs RH                            | Improved motor function                                                       | 12         | 443     | 441     | 0.4(0.14,0.65)     | Low      |
| MA+RH vs RH                         | Improved activities of daily living                                           | 24         | 888     | 893     | 0.67(0.42,0.92)    | Low      |
| <b>Boram Lee 2018</b>               | <b>Neurology (Autism spectrum disorder in children)</b>                       |            |         |         |                    |          |
| MA vs BEI                           | Symptoms improvement *                                                        | 2          | 53      | 54      | -0.52(-0.91,-0.13) | Low      |
| <b>Kim Jiwon 2019</b>               | <b>Connective tissue diseases (Fibromyalgia syndrome)</b>                     |            |         |         |                    |          |
| MA/EA vs SA                         | Sleep Quality *                                                               | 3          | 86      | 84      | -0.46(-0.75,-0.18) | Low      |
| <b>Yun-xia Li 2018</b>              | <b>Connective tissue diseases (Non-specific low back pain)</b>                |            |         |         |                    |          |
| MA vs NI                            | Intensity of pain *                                                           | 2          | 1490    | 1318    | -0.69(-0.99,-0.38) | Low      |
| <b>Lu Wang 2020</b>                 | <b>Gastrointestinal disorders (Functional Constipation)</b>                   |            |         |         |                    |          |
| MA vs SA                            | Improved complete spontaneous bowel symptom                                   | 3          | 584     | 587     | 0.49(0.38,0.61)    | Low      |
| <b>Xin Jin 2018</b>                 | <b>Gastrointestinal disorders (Functional dyspepsia)</b>                      |            |         |         |                    |          |
| MA/EA vs WM                         | Symptoms improvement *                                                        | 4          | 216     | 216     | 0.47(0.27,0.66)    | Low      |
| <b>Charlotte Southern 2016</b>      | <b>Mental health (Alcohol use disorder)</b>                                   |            |         |         |                    |          |
| EA/AA vs SA                         | Reduced alcohol withdrawal symptoms*                                          | 1          | 50      | 50      | -0.54(-0.93,-0.14) | Low      |
| <b>Caroline A Smith 2018</b>        | <b>Mental health (Depression)</b>                                             |            |         |         |                    |          |
| MA vs NI                            | Severity of depression at the end of treatment*                               | 5          | 217     | 241     | -0.56(-0.98,-0.15) | Low      |
| <b>Eun-Young Nam 2018</b>           | <b>Obstetrics, gynecology and women's health (Menopausal hot flashes)</b>     |            |         |         |                    |          |
| MA vs NI                            | Frequency of hot flash symptom (4 weeks after treatment started)*             | 1          | 116     | 59      | -0.47(-0.78,-0.15) | Low      |
| <b>Juan Zhu 2019</b>                | <b>Periprocedural care (Postoperative pain)</b>                               |            |         |         |                    |          |
| EA/AA vs SA                         | Intensity of resting pain at 24 h *                                           | 26         | 556     | 532     | -0.64(-0.89,-0.38) | Very low |
| <b>Yongjun ZHU 2017</b>             | <b>Periprocedural care( Total knee arthroplasty)</b>                          |            |         |         |                    |          |
| TENs vs SA                          | Severity of pain 24h after operation *                                        | 2          | 51      | 51      | -0.47(-0.87,-0.08) | Very low |
| <b>Cuihua Yang 2018</b>             | <b>Neurology (Senile insomnia)</b>                                            |            |         |         |                    |          |
| MA vs WM                            | Sleep quality*                                                                | 5          | 153     | 148     | -0.46(-0.89,-0.03) | Very low |
| <b>Hwan Kim 2019</b>                | <b>Neurology (Mild cognitive impairment)</b>                                  |            |         |         |                    |          |
| EA vs WM                            | Improved Cognitive function                                                   | 5          | 131     | 134     | 0.4(0.16,0.65)     | Very low |
| <b>Eric Manheime, Ke Cheng 2018</b> | <b>Connective tissue diseases (Hip osteoarthritis)</b>                        |            |         |         |                    |          |
| EA vs WM                            | Intensity of pain *                                                           | 1          | 30      | 30      | -0.64(-1.16,-0.12) | Very low |
| MA vs SA                            | Quality of life (emotional) during treatment *                                | 1          | 32      | 30      | -0.56(-1.07,-0.05) | Very low |
| <b>Lu Wang 2020</b>                 | <b>Gastrointestinal disorders (Functional Constipation)</b>                   |            |         |         |                    |          |
| MA vs SA                            | Severity of constipation symptoms *                                           | 4          | 387     | 214     | -0.4(-0.78,-0.03)  | Very low |
| <b>Xin Jin 2018</b>                 | <b>Gastrointestinal disorders (Functional dyspepsia)</b>                      |            |         |         |                    |          |
| MA/EA vs WM                         | Symptoms improvement *                                                        | 4          | 145     | 141     | -0.66(-0.9,-0.42)  | Very low |
| <b>Kun Hyung Kim 2016</b>           | <b>Genitourinary disorders (Chronic kidney disease)</b>                       |            |         |         |                    |          |
| MA vs UC                            | Severity of depression *                                                      | 3          | 63      | 65      | -0.44(-0.79,-0.09) | Very low |
| MA vs UC                            | Sleep quality*                                                                | 4          | 92      | 88      | -0.55(-0.96,-0.14) | Very low |

Note: NO.: number; RCT: randomized controlled trials; T: treatment group; C: control group; SMD: standard mean difference; CI: confidence interval; CoE: certainty of evidence assessed using the Grading of Recommendations Assessment, Development and Evaluation approach; MA: manual acupuncture; EA: electro-acupuncture; SA: sham acupuncture; AA: auricular acupuncture; TENs: transcutaneous electrical nerve stimulation; SC: standard care; UC: usual care; NI: no intervention; WM: western medicine; BEI: behavioral and educational interventions; RH: rehabilitation. The asterisk(\*) was used to present the effect estimate when a lower value indicated a better outcome.

### Appendix 1 Moderate effects with low or very low certainty evidence
